# Supplementary material for: An Integrated Metabolomics Study of Glucosinolate Metabolism in Different Brassicaceae Genera
Source: MDPI journal article supplement (doi:10.3390/metabo10080313), 2020-07-31
Supplement: s1 [file s1]

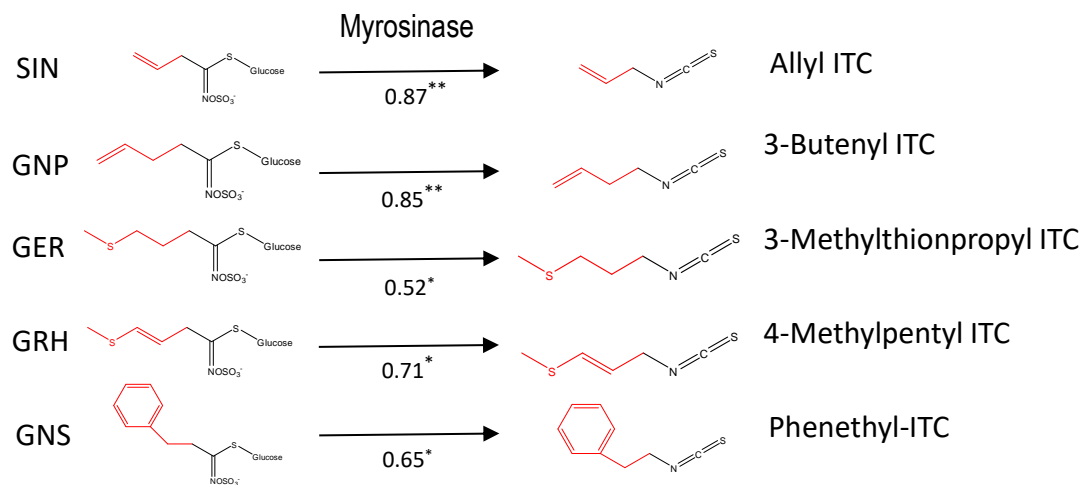

Fig. S2 Relationship between parent glucosinolates and downstream isothiocyanates. Pearson correlation analysis were performed between glucosinolates (log transformed concentration (ng g<sup>-1</sup>), and isothiocyanates (log10 transformed peak area/g) .The numbers represent correlation coefficient values. \*, p < 0.05; \*\*, p < 0.01. SIN, sinigrin; GNP, gluconapin; GER, glucoerucin; GRH, glucoraphasatin; GNS, gluconasturtiin; ITC, isothiocyanate.
