# Supplementary material for: An Integrated Metabolomics Study of Glucosinolate Metabolism in Different Brassicaceae Genera
Source: Metabolites. 2020 Jul 31;10(8):313. doi: 10.3390/metabo10080313 (PMC7463649; doi:10.3390/metabo10080313)
Supplement: Supplementary file 1 [file metabolites-10-00313-s001.zip]

Archive with 5 entries (4 files):
- metabolites-840743-supplementary-re/
- metabolites-840743-supplementary-re/Fig.S1.PNG
- metabolites-840743-supplementary-re/Fig.S2.pdf
- metabolites-840743-supplementary-re/Fig.S3.PNG
- metabolites-840743-supplementary-re/Table S1-S6.xlsx
