# Supplementary material for: An Integrated Metabolomics Study of Glucosinolate Metabolism in Different Brassicaceae Genera
Source: Metabolites. 2020 Jul 31;10(8):313. doi: 10.3390/metabo10080313 (PMC7463649; doi:10.3390/metabo10080313)
Supplement: Supplementary file 1 [file metabolites-10-00313-s001.zip › metabolites-840743-supplementary-re/Table S1-S6.xlsx]

## Sheet: Table S1 QuantitativeResults
Table S1. Quantitative results of the amino acids and the glucosinolates in 5 Brassicaceae vegetables (µg/g dry weight)
Vegetables	Broccoli-1	Broccoli-2	Broccoli-3	Broccoli-4	Broccoli-5	Choysum-1	Choysum-2	Choysum-3	Choysum-4	Choysum-5	Radish-1	Radish-2	Radish-3	Radish-4	Radish-5	Rocket salad-1	Rocket salad-2	Rocket salad-3	Rocket salad-4	Rocket salad-5	Watercress-1	Watercress-2	Watercress-3	Watercress-4	Watercress-5
Amino acids
Methionine	96.9158	79.9424	117.18	92.9306	135.528	50.0517	48.579	44.7756	29.4093	42.3351	40.7829	44.8949	51.0409	63.8158	30.7063	210.66	188.456	205.271	275.113	202.955	203.461	156.241	142.521	132.029	154.297
Valine	1831.69	2594.17	2057.04	3696.93	3822.04	1116.49	941.041	863.872	870.475	786.763	962.244	975.161	1172.43	1632.7	858.805	3728.55	3164.01	3598.44	3990.27	4024.86	3461.2	2238.75	2291.84	3742.38	3765.09
Leucine	1125.91	1125.03	1376.05	2560.98	1659.37	291.938	259.997	236.495	345.479	189.242	166.789	139.301	165.975	212.279	176.011	270.089	459.114	520.818	660.721	1050.45	1536.93	1051.6	1141.7	1126.94	1091.36
Isoleucine	978.103	1405.02	1130.4	2282.66	2191.15	648.434	532.577	547.58	630.58	425.471	455.717	702.639	796.964	864.243	435.245	549.325	1169.98	1332.47	1529.07	1996.31	2401.26	1629.98	1697.62	2126.86	2247.37
Pheylalanine	930.988	1167.31	902.888	2098.95	2007.49	778.266	761.884	585.065	506.027	665.674	169.432	290.213	315.362	188.792	120.563	5258.42	3193.21	3697.18	3855.71	3191.77	3179.78	1432.53	1550.93	3589.52	3654.84
Tyrosine	995.447	1157.68	721.42	1728.96	897.246	368.506	378.875	331.858	324.342	235.239	162.557	150.246	166.51	237.347	107.538	1730.54	483.819	486.693	706.344	1718.03	1488.67	868.537	851.449	963.398	1061.11
Tryptophan	400.907	483.264	364.227	816.107	820.537	398.883	341.922	284.162	252.247	277.017	71.9141	126.728	123.677	151.063	58.2196	2028.3	1437.85	1631.64	1781.25	987.163	1455.26	921.832	940.51	2024.09	1867.69
Aspartic acid	6151.35	9126.63	5824.55	5960.17	10400.2	3655.36	3918.67	3287.95	3619.93	3968.7	1504.25	1481.62	1691.21	1963.71	1466.49	3021.53	4035.82	3965.96	4357.98	2310.53	2863.63	3253.29	3314.1	2501.56	3045.89
Alanine	5796.32	4587.91	5668.04	10243.8	2800.9	1985.2	1838.95	1951.25	2276.25	1729.74	1616.86	1230.96	1709.41	3658.35	1479.03	1430.53	2654.85	2464.9	3479.53	4306.88	1836.44	1474.24	1496.15	1393.61	1503.8
Lysine	1120.86	971.774	1079.08	2372.49	1712.8	728.921	685.999	623.163	614.439	548.155	254.867	248.398	268.446	327.499	190.952	1739.69	1100.43	1181.31	1630.32	2620.78	2632.72	1546.55	1500.13	1768.51	1972.24
Threonine	1379.61	1938.91	1384.28	2301.54	1727.32	1103.93	736.638	790.027	777.952	529.961	549.442	610.89	604.466	1014.34	504.177	1928.86	2203.07	2140.66	2542.38	2897.45	2646.28	1918.53	1895.85	1559.73	1787.31
Glutamine	10331.3	8748.54	16384.9	21222.8	50811.6	7337.6	7425.56	7911.26	7319.99	5290.89	13802.6	15281	17078	18958.4	6951.83	41033.4	25852.1	29494.5	26713.6	35489.2	37394.5	31841.8	30021.9	31128.4	33889.2
Glutamic acid	9027.68	9132.38	12332	18264.3	13224.5	6123.36	5881.8	5683.57	7380.51	4844.29	3256.6	1372.74	1972.83	4797.56	2505.78	9019.05	7137.76	7836.25	8762.7	6317.8	6559.01	5741.26	6298.85	12665.3	12885.7
Arginine	3204.79	6127.02	3882.32	8651.91	17267.3	1599.4	1494.2	1279.01	974.807	943.098	620.554	279.595	308.011	1922.62	446.74	8084.94	5273.36	5621.5	7402.71	5552.71	4745.5	3265.57	3451.71	5442.26	5297.96
Serine	3694.45	5982.48	4740.96	4709.93	5281.66	1274.68	1170.83	945.7	1037.82	909.256	670.015	550.791	667.008	839.176	605.57	3312.63	3267.1	3608.32	4260.51	4409.55	2708.88	1854.38	1938.82	2932.85	2965.58
Asparagine	2667.87	6346.83	5536.15	7736.78	13772.4	2074.6	2263.06	1949.04	1512.44	1896	1135.43	941.55	1196.12	1692.46	615.873	2147.9	11332.1	11708.4	15346.6	2743.49	8261.62	5361.96	5466.48	8162.04	7917.46
Histidine	1284.05	2173.65	1809.8	3291	2838.5	516.909	485.434	374.357	325.813	380.129	282.243	217.949	241.643	511.634	209.136	2517.69	1680.83	1787.11	1839.34	1456.9	1762.24	1283.27	1244.52	2214.5	1997.82
Glycine	263.412	276.306	245.787	196.2	85.1235	184.961	171.271	206.402	167.816	110.461	327.02	215.351	270.14	487.154	117.353	249.626	297.651	196.257	164.463	359.725	266.694	176.399	146.96	129.089	94.3311
Proline	1755.81	4335.74	5091.43	3824.38	1777.64	500.411	404.727	403.893	693.232	337.704	324.79	330.11	332.065	433.34	334.545	839.685	654.963	716.724	1265.19	3494.65	664.528	517.127	493.06	536.22	583.36
Citrulline	47.992	40.9624	34.0781	81.7859	27.6071	11.747	9.55899	9.3725	8.16067	0.51588	5.57312	2.30053	2.03513	9.53913	0.25794	276.814	83.1255	95.4074	73.1036	112.299	30.2315	27.1527	24.5564	26.5016	12.4966
Glucosinolates
Sinigrin	0.48	0.45	0.39	0.63	0.28	0.53	0.76	0.26	0.33	0.79	0.13	0.13	0.13	0.13	0.13	0.13	0.13	0.13	0.13	0.13	0.13	0.13	0.13	0.13	0.13
Glucoiberin	296.78	260.88	242.29	324.54	254.46	0.22	0.22	0.22	0.22	0.22	0.56	0.71	0.76	0.58	0.71	0.22	0.22	0.22	0.22	0.22	0.44	1.09	0.6	0.56	0.47
Glucoraphasatin	0.32	0.89	0.5	0.44	0.94	0.5	0.67	0.56	0.55	0.35	5807.29	5194.01	4234.55	4547.11	3192.19	0.16	0.16	0.16	0.16	0.16	0.16	0.16	0.16	0.16	0.16
Glucosativin	149.225	149.225	149.225	149.225	149.225	149.225	149.225	149.225	149.225	149.225	309.17	298.45	306.34	330.68	457.32	4620.15	4974.47	4142.04	4458.8	4666.34	149.225	149.225	149.225	149.225	149.225
Glucoerucin	7.16	9.66	6.35	8.7	3.03	0.16	0.16	0.16	0.16	0.16	31.3	58.38	54.14	69.59	40.71	31	26.21	36.27	42.64	35.3	0.89	1.31	0.51	0.32	1.08
Glucoraphenin	67.255	67.255	67.255	67.255	67.255	67.255	67.255	67.255	67.255	67.255	136.48	150.16	163.7	134.51	152.29	67.255	67.255	67.255	67.255	67.255	67.255	67.255	67.255	67.255	67.255
Glucoraphanin	1070.71	808.09	865.06	1288.02	1588.67	3.75	6.21	5.47	5.05	6.15	11.45	13.86	18.7	14.19	16.68	975.88	1058.4	1454.38	979.62	1286.53	3.85	5.91	4.55	1.51	2.89
Gluconapin	0.29	0.09	0.16	0.58	0.11	198.35	212.29	144.47	162.27	256.84	0.12	0.1	0.38	0.1	0.11	5.09	6.22	3.15	4.29	8.31	0.19	0.15	0.26	0.13	0.14
Progoitrin	21.25	23.23	22.18	18.23	10.29	1620.1	1963.21	1316.21	1187.92	1487.85	35.47	22.1	25.01	26.9	19.35	15.19	14.92	19.21	20.55	26.45	15.58	20.49	17.82	13.13	19.51
Glucoalyssin	22.12	24.61	19.15	18.25	10.23	130.58	135.02	147.22	141.11	174.96	13.36	20.28	19.35	22.55	18.35	22.16	20.99	21.39	21.43	19.5	145.96	113.42	163.25	132.78	147.78
Glucobrassicanapin	16.63	16.63	16.63	16.63	16.63	90.34	115.17	33.26	88.54	192.85	16.63	16.63	16.63	16.63	16.63	16.63	16.63	16.63	16.63	16.63	16.63	16.63	16.63	16.63	16.63
Gluconapoleiferin	0.205	0.205	0.205	0.205	0.205	0.51	0.41	0.41	0.45	0.6	0.205	0.205	0.205	0.205	0.205	0.205	0.205	0.205	0.205	0.205	0.205	0.205	0.205	0.205	0.205
Glucobrassicin	590.57	624.17	529.36	470.63	534.51	111.6	129.95	121.54	116.59	139.22	3.18	2.45	1.69	2.01	1.74	0.21	0.18	0.16	0.17	0.22	595.85	588.51	420.78	481.42	484.5
Neoglucobrassicin	1449.71	1416.85	1318.96	1427.93	1618.5	3620.15	3974.47	3432.2	3508.37	3344.68	517.59	493.21	589.8	508.37	344.68	172.34	172.34	172.34	172.34	172.34	172.34	172.34	172.34	172.34	172.34
4-Methoxyglucobrassicin	2704.89	2416.68	2351.87	2511.09	2543.2	2066.15	1672.22	1743.08	1843.41	1761.27	1127.21	1063.67	1229.3	1221.54	1630.28	844.25	882.8	780.47	792.19	856.95	2996.06	2940.18	2948.59	2373.71	2547.11
4-Hydroxyglucobrassicin	3505.39	3073.89	3475.61	3011.13	3028.48	41.66	77.46	63.12	57.55	75.76	2567.49	2653.41	2167.75	254.32	2692.7	841.41	727.83	739.02	845.2	748.22	1847.25	988.23	1063.98	834.4	1490.34
Glucotropaeolin	0.44	0.94	0.85	0.48	0.18	0.35	0.24	0.29	0.83	3.04	0.83	0.06	0.62	0.41	0.05	2.59	10.19	16.6	17.36	18.56	0.13	0.23	0.12	0.11	0.25
Gluconasturtiin	39.37	31.82	34.58	32.9	32.66	59.44	55.44	54.9	54.63	56.54	32.14	35.52	39.06	32.17	32	16.59	23.7	17.04	24.03	24.77	5529.22	6349.38	5493.33	5353.04	4502.32
Glucobarbarin	732.57	1133.86	611.46	772.67	738.98	10.57	8.58	12.24	8.41	6.28	40.16	42.19	46.11	42.11	49.4	987.75	1377.86	1175.96	860.59	801.59	3.14	3.14	3.14	3.14	3.14

## Sheet: Table S2 Vegetable sources
Table S2 Sources of 12 types vegetables
Vegetable	Batch	Brand	Country of origin
Broccoli	1	NTUC Fairprice	Australia
	2	NTUC Fairprice	Australia
	3	NTUC Fairprice	Australia
Brussels sprouts	1	Pasar	Australia
	2	Pasar	Australia
	3	Pasar	Australia
Cabbage	1	NTUC Fairprice	Beijing
	2	NTUC Fairprice	Beijing
	3	NTUC Fairprice	Beijing
Caixin Zai	1	Kok Fah	Singapore
	2	Kok Fah	Singapore
	3	Kok Fah	Singapore
Cauliflower	1	NTUC Fairprice	Australia
	2	NTUC Fairprice	Australia
	3	NTUC Fairprice	China
	4	NTUC Fairprice	Australia
Da Bai Cai	1	NTUC Fairprice	Australia
	2	NTUC Fairprice	Australia
	3	NTUC Fairprice	Australia
Kailan Zai	1	Kok Fah	Singapore
	2	Kok Fah	Singapore
	3	Kok Fah	Singapore
Radish	1	Go fresh	Malaysia
	2	Go fresh	Malaysia
	3	Go fresh	Malaysia
Red radish	1	Versland Selection B.V.	Netherlands
	2	Versland Selection B.V.	Netherlands
	3	Versland Selection B.V.	Netherlands
Rocket	1	Altamura	Italy
	2	Altamura	Italy
	3	Altamura	Italy
Xiao Bai Cai	1	Kok Fah	Singapore
	2	Kok Fah	Singapore
	3	Kok Fah	Singapore
Watercress	1	Pasar	Indonesia
	2	Pasar	Indonesia
	3	Pasar	Indonesia

## Sheet: Table S3 GLS MS info
Table S3.a. The multiple reaction monitoring (MRM) conditions of 22 glucosinolates in HILIC-MS/MS analysis
Glucosinolates	RT (min)	Precursor ion	Product ion	CE (V)	Internal standard	Calibration curve
Aliphatic
Sinigrin a	3.94	358	97, 195	24	Glucosinalbin	Sinigrin
Glucoiberin a	11.3	422	259, 358	26	Glucosinalbin	Glucoiberin
Glucocheirolin a	5.19	438	97, 259	26	Glucosinalbin	Glucocheirolin
Glucoraphasatin	2.79	418	97, 259	26	Glucosinalbin	Glucoerucin
Glucosativin	3.45	406	97, 259	26	Glucosinalbin	Glucoerucin
Glucoerucin a	3	420	97, 259	26	Glucosinalbin	Glucoerucin
Glucoraphenin a	10.3	434	97, 259	24	Glucosinalbin	Glucoraphenin
Glucoraphanin a	11.2	436	97, 372	26	Glucosinalbin	Glucoraphanin
Gluconapin a	3.6	372	97, 259	26	Glucosinalbin	Gluconapin
Epiprogoitrin a	5.42	388	97, 259	24	Glucosinalbin	Epiprogoitrin
Progoitrin a	5.72	388	97, 259	24	Glucosinalbin	Progoitrin
Glucoalyssin a	10.46	450.1	97, 259	26	Glucosinalbin	Glucoalyssin
Glucobrassicanapin a	3.1	386.1	97, 259	26	Glucosinalbin	Glucobrassicanapin
Gluconapoleiferin	5	402.1	97, 259	26	Glucosinalbin	Glucobrassicanapin
Indole
Glucobrassicin a	3.23	447.1	97, 259	26	Glucosinalbin	Glucobrassicin
Neoglucobrassicin	2.21	477.1	97, 259	24	Glucosinalbin	Glucobrassicin
4-Methoxyglucobrassicin	3.29	477.1	97, 259	26	Glucosinalbin	Glucobrassicin
4-Hydroxyglucobrassicin a	4.52	463	97, 259	26	Glucosinalbin	4-Hydroxyglucobrassicin
Aromatic
Glucotropaeolin a	2.65	408	97, 259	24	Glucosinalbin	Glucotropaeolin
Gluconasturtiin a	2.49	422.1	97, 259	24	Glucosinalbin	Gluconasturtiin
Glucobarbarin a	10.96	438.1	97, 259	26	Glucosinalbin	Glucobarbarin
Glucosinalbin a, b	4.3	424	97, 259	26	Glucoraphenin	Glucosinalbin
RT, retention time; CE, collision energy
a These 17 glucosinolates have available standards.
b Glucosinalbin is only present in Rocket salad, and no exists in other 11 examined vegetables. In this study, it was used as an internal standard for quantitative analysis of glucosinolates in the 12 vegetables, except Rocket salad, in which glucoraphenin was used as the internal standard for quantitative analysis of glucosinolates, as it is not present in Rocket salad.
Table S1. b. MS and MSn information of five glucosinolates
Glucosinolates	Formula	Exact Mass	[M-H]-	RT (min)	MS/MS fragments	ppm
Glucoraphasatin	C12H21NO9S3	419.038	418.031	2.79	97, 259, 338	1.2
Glucosativin	C11H21NO9S3	407.038	406.031	3.45	97, 259, 326	1.2
Gluconapoleiferin	C12H21NO10S2	403.061	402.054	5	97, 120, 160, 195, 225, 259	2
Neoglucobrassicin	C17H22N2O10S2	478.072	477.064	2.21	97, 205, 259, 446, 447	1
4-Methoxyglucobrassicin	C17H22N2O10S2	478.072	477.064	3.29	97, 195, 291, 259, 397	1
MS/MS spectrum of eight glucosinolates

## Sheet: Table S4 AAs and ITCs MS info
Amino acids MS information analyzed by GC-Q-TOF
Isothiocyanates MS information analyzed by GC-Q-TOF
Spectrum in red is from vegetable samples, and spectrum in blue is from the NIST11.0 library.

## Sheet: Table S5 targeted AA info
Table S5.a. Optimized multiple reaction monitoring (MRM) conditions for the 20 targeted amino acids
Metabolite	Platform	R.T. (min)	Transition ion	Fragmentor	Collision energy	Internal standard	Calibration curve
			(m/z)	voltage (V)	(eV)
Alanine	LC-MS/MS, HILIC, pos	12.16	90.1 -> 44.0	70	10	13C3, 15N-Alanine	Alanine
Arginine	LC-MS/MS, HILIC, pos	15.51	175.1 -> 70.0	90	18	13C6, 15N4-Arginine	Arginine
			175.1 -> 60.0
Asparagine	LC-MS/MS, HILIC, pos	13.99	133.1 -> 74.0	70	14	13C4, 15N2-Asparagine	Asparagine
			133.1 -> 87.1
Aspartic acid	LC-MS/MS, HILIC, pos	15.35	134.0 -> 74.0	90	10	13C4, 15N-Aspartic acid	Aspartic acid
Citrulline	LC-MS/MS, HILIC, pos	14.42	176.0 -> 70.0	90	12	13C6, 15N3-Histidine	Citrulline
			176.0 -> 113.2
Glutamic acid	LC-MS/MS, HILIC, pos	14.71	148.1 -> 84.0	90	17	13C5, 15N-Glutamic acid	Glutamic acid
Glutamine	LC-MS/MS, HILIC, pos	13.72	147.1 -> 84.0	70	16	13C5, 15N2-Glutamine	Glutamine
Glycine	LC-MS/MS, HILIC, pos	13.01	76.0 -> 30.0	70	8	13C2, 15N-Glycine	Glycine
Histidine	LC-MS/MS, HILIC, pos	15.11	156.1 -> 110.0	90	15	13C6, 15N3-Histidine	Histidine
Isoleucine	LC-MS/MS, HILIC, pos	9.59	132.1 -> 86.1	70	12	13C6, 15N-Isoleucine	Isoleucine
			132.1 -> 69.0
Leucine	LC-MS/MS, HILIC, pos	9.1	132.1 -> 86.1	70	12	13C6, 15N-Leucine	Leucine
			132.1 -> 69.0
Lysine	LC-MS/MS, HILIC, pos	15.66	147.1 -> 84.0	90	12	13C6, 15N2-Lysine	Lysine
Methionine	LC-MS/MS, HILIC, pos	10.44	150.1 -> 56.0	70	12	13C5, 15N-Methionine	Methionine
			150.1 -> 104.0
Phenylalanine	LC-MS/MS, HILIC, pos	8.7	166.1 -> 120.1	90	10	13C9, 15N-Phenylalanine	Phenylalanine
Proline	LC-MS/MS, HILIC, pos	11.32	116.1 -> 70.0	70	12	13C5, 15N-Proline	Proline
Serine	LC-MS/MS, HILIC, pos	13.8	106.1 -> 60.0	70	8	13C3, 15N-Serine	Serine
Threonine	LC-MS/MS, HILIC, pos	12.64	120.1 -> 56.0	70	15	13C4, 15N-Threonine	Threonine
			120.1 -> 74.0
Tryptophan	LC-MS/MS, HILIC, pos	8.75	205.1 -> 146.0	70	18	13C11, 15N2-Tryptophan	Tryptophan
			205.1 -> 118.1
Tyrosine	LC-MS/MS, HILIC, pos	11.25	182.1 -> 136.0	90	10	13C9, 15N-Tyrosine	Tyrosine
			182.1 -> 123.0
Valine	LC-MS/MS, HILIC, pos	11.32	118.1 -> 72.1	70	10	13C5, 15N-Valine	Valine
			118.1 -> 55.0
Table S3.b. Method valitation for amino acids
Compound	Linearity range (R2>0.999)	Stability			Precision (CV%)		Recovery (%)			LOD (nmol/L)	LOQ (nmol/L)	Matrix effect
	(µmol/L)	0h (%)	24h (%)	48h (%)	Intraday (n=6)	Interday (n= 18)	Low	Medium	High	S/N=3	S/N=10
Alanine	0.03-30	100	100.173	101.708	1.29991	1.35851	96.8142	96.3323	96.1695	2.5*	10*	1.02485
Arginine	0.03-30	100	101.951	101.911	0.802309	1.30416	98.4592	101.191	99.9669	0.3*	1*	0.939804
Asparagine	0.03-30	100	100.864	103.962	2.37587	2.43476	99.5928	99.528	104.068	2*	5	0.979578
Aspartic acid	0.03-30	100	100.408	100.964	2.98319	2.73055	102.623	109.084	104.565	2*	6	0.959226
Citrulline	0.06-3	100	95.0627	104.481	3.35766	4.79576	105.843	108.781	109.016	1*	3*	0.974841
Glutamic acid	0.03-30	100	100.591	103.144	1.29802	2.07212	102.047	98.0027	95.6738	6	30	1.01415
Glutamine	3-290	100	93.7844	95.2904	1.37717	3.41908	104.566	92.3112	90.1272	0.2*	0.5*	1.07699
Glycine	0.03-30	100	103.602	102.76	1.70488	2.14811	105.804	102.017	90.5519	2*	5	1.07739
Histidine	0.03-30	100	99.2965	98.1485	1.8888	1.73493	103.439	109.621	109.157	6	15*	0.960639
Isoleucine	0.03-30	100	99.8918	100.514	1.90395	1.3043	103.858	103.158	104.197	5	15*	1.0121
Leucine	0.03-30	100	99.4407	100.786	0.546989	1.30512	100.303	103.562	97.3296	5	15*	1.01655
Lysine	0.03-30	100	100.133	98.7455	1.00558	1.50776	102.385	105.243	107.118	0.8*	2.5*	0.947794
Methionine	0.06-15	100	102.223	104.927	0.767963	3.14377	94.9553	100.263	90.5308	2*	6	1.02897
Phenylalanine	0.03-30	100	102.388	101.828	0.183051	1.09737	98.5783	89.5887	91.8208	1*	3*	1.0611
Proline	0.03-30	100	98.7145	97.5791	0.946248	1.38561	101.567	96.4326	94.1364	2*	6	1.02597
Serine	0.03-30	100	99.4196	100.251	1.27555	1.34639	97.3063	97.0621	94.8406	5	15*	1.02973
Threonine	0.03-30	100	102.32	102.284	1.01479	1.40773	96.6254	93.3155	90.882	2.5*	10*	1.04719
Tryptophan	0.06-30	100	97.5731	97.2528	0.546989	1.30512	98.3342	92.4062	89.8454	1*	3*	1.05797
Tyrosine	0.03-30	100	98.8436	97.7191	1.40738	3.08996	107.049	100.607	90.7941	10*	30	1.06075
Valine	0.03-30	100	100.294	103.572	1.40738	3.08996	100.335	104.687	100.407	10*	30	0.974392
*: Calculated based on the lowest concentration of standard

## Sheet: Table S6 GLS_method validation
Table S6. Method validation of HILIC-MS/MS for 17 glucosinolates with available standards
Glucosinolates	Calibration curve		Concentration	LOD	LOQ	Accuracy (%)		Recovery (%)
	Formulation	R2	(ng/mL)	(µg/g dry weight)	(µg/g dry weight)	intra-batch	inter-batch	Low	High
Sinigrin	y = 0.037x - 0.106	0.9997	1-500	0.007	0.023	4.35	5.96	79.44	103.06
Glucoiberin	y = 0.006x + 0.012	0.9994	1-500	0.003	0.01	4.82	6.32	112.1	84.36
Glucocheirolin	y = 0.038x - 0.036	0.9998	1-500	0.004	0.013	4.17	3.34	95.74	106.37
Glucoerucin	y = 0.073x - 0.725	0.9991	1-1000	0.009	0.03	7.21	6.76	84.04	110.19
Glucoraphenin	y = 0.47x - 1.149	0.9985	1-500	0.001	0.003	2	8.85	90.45	84.25
Glucoraphanin	y = 0.018x - 0.020	0.9998	1-500	0.013	0.043	4.06	7.67	85.26	98.4
Gluconapin	y = 0.054x - 0.012	0.9999	1-250	0.003	0.01	8.61	5.96	78.36	87.43
Epiprogoitrin	y = 0.033x - 0.068	0.9994	1-250	0.007	0.023	6.1	5.7	117.01	96.59
Progoitrin	y = 0.015x - 0.061	0.9997	1-1000	0.028	0.093	4.23	5.35	84.69	95.64
Glucoalyssin	y = 0.017x + 0.029	0.9991	1-500	0.013	0.043	6.74	9.04	95.26	114.17
Glucobrassicanapin	y = 0.079x - 0.936	0.9987	1-1000	0.008	0.027	9.24	9.95	81.67	91.45
Glucobrassicin	y = 0.042x - 0.133	0.9995	1-500	0.019	0.063	5.51	8.75	92.3	120.31
4-Hydroxyglucobrassicin	y = 0.004x - 0.016	0.9996	1-1000	0.021	0.07	2.43	9.02	76.46	107.01
Glucotropaeolin	y = 0.082x - 0.265	0.9998	1-500	0.004	0.013	5.58	7.29	120.14	106.33
Gluconasturtiin	y = 0.052x - 0.129	0.999	1-500	0.006	0.02	4.29	7.16	105.76	102.56
Glucobarbarin	y = 0.002x + 0.003	0.9979	5-500	0.023	0.077	6.54	3.33	114.79	99.05
Glucosinalbin	y = 0.003x + 0.008	0.9991	5-500	0.007	0.023	2.02	8.99	95.01	101.22
LOD, limit of detection; LOQ, limit of quantification.
